# Supplementary material for: Validation of Dietary Intake Estimated by Web-Based Dietary Assessment Methods and Usability Using Dietary Records or 24-h Dietary Recalls: A Scoping Review
Source: MDPI journal article supplement (doi:10.3390/nu15081816), 2023-04-08
Supplement: s1 [file s1]

Table S1. Reason for the excluded studies.

Review

|   | Exclusion reason                                                                                              | Reference number |
|---|---------------------------------------------------------------------------------------------------------------|------------------|
| 1 | Review, conference reports or abstract                                                                        | [5,6,14,19-31]   |
| 2 | Spanish (not written by English)                                                                              | [51]             |
| 3 | Not a validity study of nutritional intake                                                                    | [52-58]          |
| 4 | Not used the dietary records or 24-h dietary recalls for conventional or web-based dietary assessment methods | [59-68]          |
| 5 | Not using face-to-face of traditional dietary methods                                                         | [69-77]          |
| 6 | Not using internet of web-based dietary assessment methods                                                    | [78-89]          |
| 7 | Not included the general population (pregnancy)                                                               | [90, 91]         |
| 8 | Not assessed during whole one day                                                                             | [92-97]          |

Hand search

|   | Exclusion reason                                                                                   | Reference number |
|---|----------------------------------------------------------------------------------------------------|------------------|
| 1 | Not a validity study of nutritional intake                                                         | [98]             |
| 2 | Not used the dietary records or 24-h dietary recalls for conventional or web-based dietary methods | [99-101]         |
| 3 | Not using internet of web-based dietary assessment methods                                         | [102, 103]       |

Table S2. Score of including validity studies.

|                    |                                                        | Score          | Web-based dietary assessment methods |                               |                                       |                                |                              |                            |                               |                                 |                            |                                   |                            |                            |                              |                               |                                      |                                    |                         |
|--------------------|--------------------------------------------------------|----------------|--------------------------------------|-------------------------------|---------------------------------------|--------------------------------|------------------------------|----------------------------|-------------------------------|---------------------------------|----------------------------|-----------------------------------|----------------------------|----------------------------|------------------------------|-------------------------------|--------------------------------------|------------------------------------|-------------------------|
|                    |                                                        |                | Dietary records                      |                               |                                       |                                |                              |                            |                               | 24-hour dietary recalls         |                            |                                   |                            |                            |                              |                               |                                      |                                    |                         |
| Variables          |                                                        |                | Matsu<br>zaki E<br>et al.<br>[35]    | Monne<br>rie B et<br>al. [37] | Vereec<br>ken<br>CA et<br>al.<br>[48] | Storey<br>KE et<br>al.<br>[38] | Beasle<br>y J et<br>al. [44] | Raatz<br>SK et<br>al. [46] | Teixeir<br>a V et<br>al. [49] | Lafreni<br>ère J et<br>al. [34] | Timon<br>CM et<br>al. [36] | Lindro<br>os AK<br>et al.<br>[39] | Timon<br>CM et<br>al. [40] | Albar<br>SA et<br>al. [41] | Bradle<br>y J et<br>al. [42] | Brassar<br>d D et<br>al. [43] | Franke<br>nfeld<br>CL et<br>al. [47] | Mescol<br>oto SB<br>et al.<br>[50] | Liu B<br>et al.<br>[45] |
| 1. Sample          | Non-homogeneous sample (sex, SES, smoking and obesity) | 0.5            | 0.5                                  | 0.5                           | 0.5                                   | 0.5                            | 0                            | 0                          | 0                             | 0.5                             | 0                          | 0                                 | 0                          | 0                          | 0.5                          | 0.5                           | 0.5                                  | 0.5                                | 0.5                     |
|                    | n . 100 (n . 50 for biomarkers)                        | 0.5            | 0                                    | 0.5                           | 0.5                                   | 0.5                            | 0.5                          | 0.5                        | 0                             | 0.5                             | 0.5                        | 0.5                               | 0.5                        | 0.5                        | 0.5                          | 0.5                           | 0                                    | 0                                  | 0.5                     |
| 2. Statistics      |                                                        |                |                                      |                               |                                       |                                |                              |                            |                               |                                 |                            |                                   |                            |                            |                              |                               |                                      |                                    |                         |
| Group level        | Compare/test mean or median or difference              | 1              | 1                                    | 1                             | 1                                     | 1                              | 1                            | 1                          | 1                             | 1                               | 1                          | 1                                 | 1                          | 1                          | 0                            | 1                             | 1                                    | 1                                  | 1                       |
| Correlations       | Crude correlation: 0.5 points                          |                |                                      |                               |                                       |                                |                              |                            |                               |                                 |                            |                                   |                            |                            |                              |                               |                                      |                                    |                         |
|                    | Adjusted correlations (energy): 1.0 points             | 0.5 - 1.5      | 1                                    | 0                             | 0                                     | 1.5                            | 0                            | 0                          | 0.5                           | 1.5                             | 1.5                        | 1.5                               | 0                          | 1.5                        | 0                            | 0                             | 0.5                                  | 0.5                                | 0.5                     |
| Agreement          | Deattenuated or intraclass correlations: 1.5 points    |                |                                      |                               |                                       |                                |                              |                            |                               |                                 |                            |                                   |                            |                            |                              |                               |                                      |                                    |                         |
|                    | Classification or Bland & Altman plot                  | 0.5            | 0.5                                  | 0                             | 0                                     | 0                              | 0.5                          | 0.5                        | 0.5                           | 0.5                             | 0.5                        | 0.5                               | 0.5                        | 0.5                        | 0.5                          | 0                             | 0.5                                  | 0                                  | 0.5                     |
| 3. Data collection | Gathered by face to face interview                     | 1              | 0 <sup>a</sup>                       | 1                             | 0 <sup>b</sup>                        | 1                              | 1                            | 1                          | 1                             | 1                               | 1                          | 1                                 | 1                          | 1                          | 1                            | 1                             | 0 <sup>b</sup>                       | 1                                  | 1                       |
| 4. Seasonality     | Considered                                             | 0.5            | 0                                    | 0                             | 0                                     | 0                              | 0                            | 0                          | 0                             | 0                               | 0                          | 0                                 | 0                          | 0                          | 0                            | 0                             | 0                                    | 0                                  | 0                       |
| 5. Supplemetns     | Included and data considered in analysis               | 1.5            | 0                                    | 0                             | 0                                     | 0                              | 0                            | 0                          | 0                             | 0                               | 0                          | 0                                 | 1.5                        | 0                          | 0                            | 1.5                           | 0                                    | 0                                  | 0                       |
| Total              |                                                        | Min:0<br>Max:7 | 3.0                                  | 3.0                           | 2.0                                   | 4.5                            | 3.0                          | 3.0                        | 3.0                           | 5.0                             | 4.5                        | 4.5                               | 4.5                        | 4.5                        | 2.5                          | 4.5                           | 2.5                                  | 3.0                                | 4.0                     |

<sup>a</sup> The conventional dietary record was non-face-to-face.

<sup>b</sup> The conventional dietary record did not describe face-to-face.
